# Supplementary material for: A longitudinal study highlights shared aspects of the transcriptomic response to cardiogenic and septic shock
Source: Crit Care. 2019 Dec 19;23:414. doi: 10.1186/s13054-019-2670-8 (PMC6921511; doi:10.1186/s13054-019-2670-8)
Supplement: Supplementary file 1 — Additional file 1: Table S1. Description of CS, SS and SC patients included in the study. For each patient is reported the type of shock, gender and age, mortality at 28 days. The cause for CS is specified for CS patients, whereas for SS and SC patients the source of infection is indicated. [file 13054_2019_2670_MOESM1_ESM.xlsx]

## Sheet: Table S1
ID	Shock	Gender	Age	Mortality 28 days	Cause for Cardiogenic Shock
E25	CS	Female	79	No	Tamponade + Congenital cardiomyopathy + Atrial Fib
E31	CS	Male	55	Yes	Stress cardiomyopathy (TakoTsubo)
G03	CS	Male	81	No	Arrhytmia (atrial fibrilation with rapid ventricular response)
G10	CS	Male	50	No	ACS (VF and CA)
G14	CS	Male	78	No	ACS (NSTEMI)
G16	CS	Male	77	No	Undetermined (decompensation of chronic HF by undetermine cause)
G24	CS	Male	46	No	ACS (STEMI with ventricular fibrilation and CA)
G32	CS	Male	73	No	Arrhytmia (Flutter with rapid ventricular rate)
G46	CS	Male	83	No	ACS (STEMI)
G48	CS	Male	70	No	Pulmonary embolism
G50	CS	Male	64	Yes	Chronic dilated cardiomyopathy (unclear cause of acute episode)
ID	Shock	Gender	Age	Mortality 28 days	Source of infection
E07	SS	Male	24	No	Respiratory
E16	SS	Male	62	Yes	Respiratory
E17	SS	Female	80	No	Abdominal
E32	SS	Female	73	No	Urinary Tract
E40	SS	Male	93	Yes	Respiratory
E41	SS	Female	91	Yes	Abdominal
G01	SS	Male	59	No	Respiratory
G07	SS	Female	74	No	Abdominal
G11	SS	Male	65	No	Respiratory
G12	SS	Male	80	Yes	Respiratory
G26	SS	Male	61	No	Other (limbs)
G28	SS	Male	63	No	Respiratory and digestive (aspiration)
G29	SS	Female	27	No	Urinary Tract
G33	SS	Male	68	Yes	Respiratory
G35	SS	Female	85	No	Abdominal
G42	SS	Male	86	No	Abdominal
G43	SS	Male	73	No	Abdominal
G44	SS	Male	32	No	Abdominal
G45	SS	Male	80	No	Respiratory
G47	SS	Female	69	No	Urinary Tract
G49	SS	Male	74	No	Other (limbs)
ID	Shock	Gender	Age	Mortality 28 days	Source of infection
E01	Septic Control	Female	47	No	Abdominal
E23	Septic Control	Male	90	No	Urinary Tract
E39	Septic Control	Male	75	No	Respiratory
G13	Septic Control	Female	73	No	Respiratory
G21	Septic Control	Male	80	No	Respiratory
